# Supplementary material for: Mechanism of phosphate removal from aqueous solutions by biochar supported nanoscale zero-valent iron
Source: RSC Adv. 2020 Oct 26;10(64):39217–25. doi: 10.1039/d0ra07391a (PMC9057329; doi:10.1039/d0ra07391a)
Supplement: RA-010-D0RA07391A-s001 [file RA-010-D0RA07391A-s001.pdf]

## **Electronic supplementary information**

### **Mechanism of phosphate removal from aqueous solutions by biochar supported nanoscale zero-valent iron**

Fengfeng Ma\*, Baowei Zhao, Jingru Diao, Yufeng Jiang, Jian Zhang

*(School of Environmental and Municipal Engineering, Lanzhou Jiaotong University, Lanzhou  
730070, China)*

\*Corresponding author. E-mail: mayibo1985@126.com

***Adsorption models*****Table 1.** List of adsorption kinetic and isotherm models used in this study

| Models                   | Expression                                          |
|--------------------------|-----------------------------------------------------|
| pseudo-first-order       | $\frac{dq_t}{dt} = k_1(q_e - q_t)$                  |
| pseudo-second-order      | $\frac{dq_t}{dt} = k_2(q_e - q_t)^2$                |
| Elovich                  | $\frac{dq_t}{dt} = \alpha \exp(-\beta q_t)$         |
| Intra-particle diffusion | $q_t = k_d t^{1/2} + C_i$                           |
| Langmuir                 | $q_e = \frac{q_m K_L c_e}{1 + K_L c_e}$             |
| Freundlich               | $q_e = K_F c_e^{1/n}$                               |
| Sips                     | $q_e = \frac{q_m K_S c_e^{1/n}}{1 + K_S c_e^{1/n}}$ |
| Temkin                   | $q_e = A \ln K_T c_e$                               |

where  $q_t$  and  $q_e$  (mg/g) are the amounts of phosphate adsorbed at time  $t$  (h) and equilibrium, respectively;  $k_1$  (h<sup>-1</sup>),  $k_2$  (g/mg/h), and  $k_d$  (mg/g/h<sup>-1/2</sup>) are the pseudo-first-order, pseudo-second-order, and intra-particle diffusion rate constants, respectively;  $\alpha$  (mg/g/h) is the initial adsorption rate,  $\beta$  (g/mg) is the desorption constant, and  $C_i$  is a constant related to the boundary layer thickness;  $K_L$  (L/mg),  $K_F$  (L/mg),  $K_S$ , and  $K_T$  are the Langmuir, Freundlich, Sips, and Temkin constants, respectively.

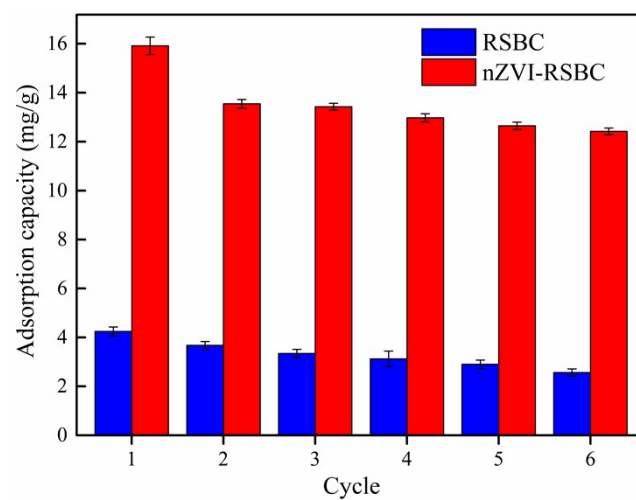

**Fig. S1** Adsorption and desorption cycles performance of RSBC and nZVI-RSBC for phosphate uptake
